# Supplementary material for: Building Urban Forest Resilience to Sea Level Rise: A GIS-Based Climate Adaptation Tool for New York City
Source: MDPI journal article supplement (doi:10.3390/f15010092), 2024-01-03
Supplement: s1 [file s1]

# Supplementary Material File S1

## Modifying factors for assessing tree species tolerance to coastal vulnerability factors; high-speed winds, salt-water flooding and salt spray

| Scoring System                            | Description                                                                                                                                                                                                                                                                                                                                                                                                                                                                |
|-------------------------------------------|----------------------------------------------------------------------------------------------------------------------------------------------------------------------------------------------------------------------------------------------------------------------------------------------------------------------------------------------------------------------------------------------------------------------------------------------------------------------------|
| ModFactor or Coastal Vulnerability Factor | A modifying factor that is considered to affect the establishment, growth, mortality rate, and regeneration of a species which could reduce or increase the habitat suitability or future abundance for that species. The three Modfactors in this analysis are 1)Salt Spray 2) Soil Salt and 3)Wind resistance                                                                                                                                                            |
| Score                                     | A score, given as an integer ranging from -3 (low tolerance indicating negative effect on growth or survival) to +3 (high tolerance indicating survival resilience), which relates to the potential influence of a ModFactor on the species. A null value was assigned for species missing any data on Coastal vulnerability factors                                                                                                                                       |
| Future Relevance                          | A value (a multiplier to Score) referring to the likely potential future relevance that a particular ModFactor could have on the distribution of a species over the next 50 years in a changing climate. Values range from 1 = not highly relevant over the next 50 years to 5 = likely to be an extremely important ModFactor. A default value of 4 was selected for all Modfactors for this analysis as we expect these factors to high relevance over the next 50 years |
| Weighted Score                            | A weighted score based on multiplication of the two default values (Score × FutureRelevance) for the species                                                                                                                                                                                                                                                                                                                                                               |
| Weighted Average                          | The average of the "Weighted Score" taken by using the number of modifying factors (here 3)                                                                                                                                                                                                                                                                                                                                                                                |
| Converted Score                           | The average of all ModFactor scores (weighted) +4 to remove negative values                                                                                                                                                                                                                                                                                                                                                                                                |
| Converted Class                           | Categories assigned for overall tolerance based on Converted Score, Low : less than 5, Moderate: 5 to 9.9, High: Greater than 9.9                                                                                                                                                                                                                                                                                                                                          |
| Tier                                      | Tiers 1, 2, and 3 were assigned based on converted classes High, Moderate and Low, respectively                                                                                                                                                                                                                                                                                                                                                                            |

| Tolerance        | Numeric Assignment | Score (S) | Future Relevance (R) | Weighted Score (S*R) | Weighted Average (W) ((S*R)/3) | Converted Score (W+4) |
|------------------|--------------------|-----------|----------------------|----------------------|--------------------------------|-----------------------|
| High             | 6                  | 3         | 4                    | 12                   | 4.0                            | 8.0                   |
| Moderate to High | 5                  | 2         | 4                    | 8                    | 2.7                            | 6.7                   |
| Moderate         | 4                  | 1         | 4                    | 4                    | 1.3                            | 5.3                   |
| Low to Moderate  | 3                  | -1        | 4                    | -4                   | -1.3                           | 2.7                   |
| Low              | 2                  | -2        | 4                    | -8                   | -2.7                           | 1.3                   |
| Poor             | 1                  | -3        | 4                    | -12                  | -4.0                           | 0.0                   |
| Unknown          | Null               | Null      | 4                    | Null                 | Null                           | Null                  |

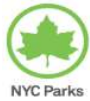

## NYC Tree Planting Coastal Species List

This species list is to be used as a guide for tree planting within New York City coastal areas.

\*Species currently not available at our nurseries.

\*\**Platanus x acerifolia* included in the list as it contributes to 28% of existing tier 1 population.

Coastal areas are delineated in the Street Tree Planting Survey Map layer "DPR\_CoastalTiers".

Tier 1: Along the coastline; High exposure to high speed winds, salt-water flooding, and salt spray

Tier 2: Farther inland from the coastline; Moderate exposure to high speed winds, salt-water flooding, and salt spray

Tier 3: Along the Urban setting and away from coastline; Low to Moderate exposure to high speed winds, salt-water flooding, and salt spray

| Species                                          | Cultivar (s)                                                | Native to NY | Planting under wires | References | Salt Spray Tolerance | Soil Salt Tolerance | Wind Resistance  | Weighted Score | Weighted Average | Coverted Score | Overall Tolerance | Coastal Tier |
|--------------------------------------------------|-------------------------------------------------------------|--------------|----------------------|------------|----------------------|---------------------|------------------|----------------|------------------|----------------|-------------------|--------------|
| <i>Amelanchier canadensis</i> *                  |                                                             | Yes          | Yes                  | [1,2]      | Moderate             | Moderate to High    | Moderate to High | 20             | 6.7              | 10.7           | High              | 1            |
| <i>Amelanchier laevis</i>                        |                                                             | Yes          | Yes                  | [3,4]      | Moderate             | Moderate            | Moderate to High | 16             | 5.3              | 9.3            | Moderate          | 2            |
| <i>Betula nigra</i>                              |                                                             | Yes          | No                   | [2,5,6]    | Low                  | Moderate            | Moderate to High | 4              | 1.3              | 5.3            | Moderate          | 2            |
| <i>Betula populifolia</i>                        |                                                             | Yes          | No                   | [6,7]      | High                 | Moderate            | Moderate         | 20             | 6.7              | 10.7           | High              | 1            |
| <i>Cedrus atlantica</i>                          |                                                             | No           | No                   | [8,9]      | Moderate             | Low                 | Low              | -12            | -4.0             | 0.0            | Low               | 3            |
| <i>Celtis occidentalis</i>                       | Chicagoland Magnifica                                       | Yes          | No                   | [10,11]    | Moderate             | Moderate            | Low to Moderate  | 4              | 1.3              | 5.3            | Moderate          | 2            |
| <i>Chionanthus virginicus</i>                    |                                                             | No           | Yes                  | [2,6,11]   | Low                  | Moderate            | Moderate to High | 4              | 1.3              | 5.3            | Moderate          | 2            |
| <i>Cornus florida</i>                            |                                                             | Yes          | Yes                  | [12,13]    | Low                  | Poor                | Moderate to High | -12            | -4.0             | 0.0            | Low               | 3            |
| <i>Crateagus crusgalli</i>                       |                                                             | Yes          | Yes                  | [14,15]    | High                 | Moderate            | Low to Moderate  | 12             | 4.0              | 8.0            | Moderate          | 2            |
| <i>Diospyrus virginiana</i> *                    |                                                             | Yes          | No                   | [5,6,16]   | High                 | Moderate            | Moderate to High | 24             | 8.0              | 12.0           | High              | 1            |
| <i>Gleditsia triacanthos</i> var. <i>Inermis</i> | Halka<br>Imperial<br>Shademaster<br>Skyline<br>Streetkeeper | Yes          | No                   | [6,14,17]  | High                 | Moderate            | Moderate to High | 24             | 8.0              | 12.0           | High              | 1            |
| <i>Ilex opaca</i>                                |                                                             | Yes          | No                   | [5,18]     | High                 | Moderate            | Moderate to High | 24             | 8.0              | 12.0           | High              | 1            |
| <i>Juniperus chinensis</i>                       | Hetzeli<br>Kaizuka<br>Ktleri<br>Robusta green               | No           | No, check cultivar   | [2,14]     | High                 | High                | Moderate         | 28             | 9.3              | 13.3           | High              | 1            |
| <i>Juniperus virginiana</i>                      |                                                             | Yes          | No                   | [2,5,6,10] | High                 | High                | Moderate         | 28             | 9.3              | 13.3           | High              | 1            |

| Species                        | Cultivar (s)                               | Native to NY | Planting under wires | References  | Salt Spray Tolerance | Soil Salt Tolerance | Wind Resistance  | Weighted Score | Weighted Avg (H/3) | Coverted Score (I+4) to remove negative values | Overall Tolerance | Coastal Tier |
|--------------------------------|--------------------------------------------|--------------|----------------------|-------------|----------------------|---------------------|------------------|----------------|--------------------|------------------------------------------------|-------------------|--------------|
| <i>Koelreutica paniculata</i>  | Rose Lanterns<br>Gold Candle<br>Fastigiata | No           | No, check cultivar   | [4,6,19]    | Moderate             | Moderate            | Low to Moderate  | 4              | 1.3                | 5.3                                            | Moderate          | 2            |
| <i>Lagetroemia indica</i>      |                                            | No           | Yes                  | [5,12]      | Moderate             | Low                 | Moderate to High | 4              | 1.3                | 5.3                                            | Moderate          | 2            |
| <i>Liquidambar styraciflua</i> |                                            | Yes          | No                   | [2,12,18]   | Moderate             | Moderate            | Moderate to High | 16             | 5.3                | 9.3                                            | Moderate          | 2            |
| <i>Magnolia grandiflora</i>    |                                            | No           | No                   | [2,12]      | Moderate             | Moderate            | Moderate to High | 16             | 5.3                | 9.3                                            | Moderate          | 2            |
| <i>Magnolia virginiana</i>     |                                            | Yes          | Yes                  | [2,6]       | Moderate             | Moderate            | Moderate to High | 16             | 5.3                | 9.3                                            | Moderate          | 2            |
| <i>Malus spp.</i>              |                                            | Yes          | Yes, check cultivar  | [9,20]      | Moderate             | Moderate            | Low to Moderate  | 4              | 1.3                | 5.3                                            | Moderate          | 2            |
| <i>Nyssa sylvatica</i>         | Forum<br>Red Rage                          | Yes          | No                   | [5,6,10,18] | Moderate             | Moderate            | Moderate to High | 16             | 5.3                | 9.3                                            | Moderate          | 2            |
| <i>Pinus nigra*</i>            |                                            | No           | No                   | [2,14]      | High                 | Moderate            | Moderate to High | 24             | 8.0                | 12.0                                           | High              | 1            |
| <i>Pinus parviflora*</i>       |                                            | No           | No                   | [14,21]     | Moderate             | Moderate            | Moderate         | 12             | 4.0                | 8.0                                            | Moderate          | 2            |
| <i>Pinus rigida</i>            | Sand Beach                                 | Yes          | No                   | [10,18]     | High                 | High                | Moderate to High | 32             | 10.7               | 14.7                                           | High              | 1            |
| <i>Pinus strobus</i>           |                                            | No           | No                   | [22,23]     | Unknown              | Poor                | Moderate to High | -4             | -1.3               | 2.7                                            | Low               | 3            |
| <i>Pinus sylvestris</i>        |                                            | No           | No                   | [14,24]     | Moderate             | Moderate            | Moderate to High | 16             | 5.3                | 9.3                                            | Moderate          | 2            |
| <i>Pinus thunbergii</i>        |                                            | No           | No                   | [2,10]      | High                 | High                | Moderate to High | 32             | 10.7               | 14.7                                           | High              | 1            |
| <i>Platanus x acerifolia**</i> |                                            | No           | No                   | [25,26]     | Poor                 | Poor                | High             | -12            | -4.0               | 0.0                                            | Low               | 3            |
| <i>Prunus maritima*</i>        |                                            | Yes          | Yes                  | [6,10]      | High                 | Moderate            | Moderate to High | 24             | 8.0                | 12.0                                           | High              | 1            |
| <i>Prunus x cistena</i>        |                                            | No           | Yes                  | [6,9]       | High                 | High                | Moderate to High | 32             | 10.7               | 14.7                                           | High              | 1            |
| <i>Quercus acutissima</i>      |                                            | Yes          | No                   | [27,28]     | Moderate             | Low                 | Low              | -12            | -4.0               | 0.0                                            | Low               | 3            |
| <i>Quercus alba</i>            |                                            | Yes          | No                   | [2,18,22]   | High                 | Moderate            | Low to Moderate  | 12             | 4.0                | 8.0                                            | Moderate          | 2            |
| <i>Quercus bicolor</i>         |                                            | Yes          | No                   | [10,14]     | Moderate             | Poor                | Moderate         | -4             | -1.3               | 2.7                                            | Low               | 3            |
| <i>Quercus imbricaria</i>      |                                            | No           | No                   | [14,29]     | High                 | Low                 | Moderate to High | 12             | 4.0                | 8.0                                            | Moderate          | 2            |
| <i>Quercus macrocarpa</i>      |                                            | No           | No                   | [2,10]      | High                 | Moderate            | Moderate to High | 24             | 8.0                | 12.0                                           | High              | 1            |
| <i>Quercus palustris</i>       |                                            | Yes          | No                   | [2,5,10]    | Low                  | Poor                | Moderate to High | -12            | -4.0               | 0.0                                            | Low               | 3            |
| <i>Quercus phellos</i>         | Hightower                                  | Yes          | No                   | [2,14,30]   | High                 | High                | Moderate         | 28             | 9.3                | 13.3                                           | High              | 1            |

| Species                        | Cultivar (s) | Native to NY | Planting under wires | References | Salt Spray Tolerance | Soil Salt Tolerance | Wind Resistance  | Weighted Score | Weighted Avg (H/3) | Covered Score (I+4) to remove negative values | Overall Tolerance | Coastal Tier |
|--------------------------------|--------------|--------------|----------------------|------------|----------------------|---------------------|------------------|----------------|--------------------|-----------------------------------------------|-------------------|--------------|
| <i>Quercus robur</i>           |              | No           | No                   | [2,14]     | High                 | Moderate            | Low to Moderate  | 12             | 4.0                | 8.0                                           | Moderate          | 2            |
| <i>Quercus stellata*</i>       |              | Yes          | No                   | [2,18]     | Moderate             | Moderate            | Moderate to High | 16             | 5.3                | 9.3                                           | Moderate          | 2            |
| <i>Quercus virginiana*</i>     |              | Yes          | No                   | [2,31]     | Moderate to High     | High                | Moderate to High | 28             | 9.3                | 13.3                                          | High              | 1            |
| <i>Styphnolobium japonicum</i> | Regent       | No           | No                   | [14,32]    | Moderate             | High                | Unknown          | 16             | 5.3                | 9.3                                           | Moderate          | 2            |
| <i>Taxodium ascendens</i>      | Nutans       | No           | No                   | [33]       | Moderate             | Moderate            | Moderate to High | 16             | 5.3                | 9.3                                           | Moderate          | 2            |
| <i>Taxodium distichum</i>      |              | No           | No                   | [2,5,31]   | Moderate             | Moderate            | High             | 20             | 6.7                | 10.7                                          | High              | 1            |
| <i>Zelkova serrata</i>         |              | No           | No                   | [9,34]     | Moderate             | Low to Moderate     | Moderate to High | 8              | 2.7                | 6.7                                           | Moderate          | 2            |

## References

- Gilman, E.F.; Watson, D.G. *Amelanchier canadensis* : Shadblow Serviceberry. Available online: <https://edis.ifas.ufl.edu/publication/ST074> (accessed on 13 December 2023).
- Appleton, B.L.; Greene, V.; Smith, A.; French, S. (Sue C.); Kane, B.; Fox, L.J.; Downing, A.K.; Gilland, T. Trees and Shrubs That Tolerate Saline Soils and Salt Spray Drift. **2009**.
- Gilman, E.F.; Watson, D.G. *Amelanchier laevis* : Allegheny Serviceberry. Available online: <https://edis.ifas.ufl.edu/publication/ST075> (accessed on 13 December 2023).
- Shrubs for Difficult Sites. Cornell University | Cooperative Extension Monroe County. Available online: <https://monroe.cce.cornell.edu/resources/shrubs-for-difficult-sites> (accessed on 13 December 2023).
- Kushla, J. Storm-Resistant Trees for Mississippi Landscapes. Available online: <https://extension.msstate.edu/publications/storm-resistant-trees-for-mississippi-landscapes>.
- Fox, L.; Koci, J. Trees and Shrubs That Tolerate Saline Soils, Salt Spray and De-Icing Salts. Available online: <https://www.pubs.ext.vt.edu/430/430-031/430-031.html> (accessed on 13 December 2023).
- Betula populifolia* : “Whitespire” (Asian White Birch, Japanese Gray Birch, Whitespire Japanese Birch) | North Carolina Extension Gardener Plant Toolbox. Available online: <https://plants.ces.ncsu.edu/plants/betula-populifolia-whit>
- Salt Tolerant Plants. North Carolina Cooperative Extension. Available online: <https://www.surfcitync.gov/DocumentCenter/View/54/Salt-Tolerant-Plants-PDF> (accessed on 15 December 2023).
- Based on Empirical Evidence Gathered by Forester at NYC Parks.
- Design and Planning for Flood Resiliency - Guidelines for NYC Parks. Available online: [https://static.nycgovparks.org/images/pagefiles/128/NYCP-Design-and-Planning-Flood-Zone\\_\\_5b0f0f5da8144.pdf](https://static.nycgovparks.org/images/pagefiles/128/NYCP-Design-and-Planning-Flood-Zone__5b0f0f5da8144.pdf) (accessed on 13 December 2023).
- Duryea, M.L.; Kampf, E. Selecting Tropical and Subtropical Tree Species for Wind Resistance. *EDIS* **2007**, 2007 , doi:10.32473/edis-fr175-2007.
- Duryea, M.L.; Kampf, E. Selecting Coastal Plain Species for Wind Resistance. *IFAS Extension* **2017**.
- Gilman, E.F.; Watson, D.G.; Klein, R.W.; Koeser, A.K.; Hilbert, D.R.; McLean, D.C. *Cornus florida* : Flowering Dogwood. Available online: <https://edis.ifas.ufl.edu/publication/ST185> (accessed on 13 December 2023).
- Jull, L.G. Winter Salt Injury and Salt-Tolerant Landscape Plants. Available online: <https://hort.extension.wisc.edu/articles/winter-salt-injury-and-salt-tolerant-landscape-plants/> (accessed on 15 December 2023).
- Crataegus crus-galli* : Cockspur Thorn, Cockspur Hawthorn, Dwarf Hawthorn PFAF Plant Database. Available online: <https://pfaf.org/user/Plant.aspx?LatinName=Crataegus+crus-galli> (accessed on 15 December 2023).
- Miyamoto, S.; Martinez, I.; Padilla, M.; Portillo, A.; Ornelas, D. Landscape Plant Lists for Salt Tolerance Assessment. *TX Agricultural Ext. Station* **2004**.
- Gleditsia triacanthos* . North Carolina State Extension. Available online: <https://plants.ces.ncsu.edu/plants/gleditsia-triacanthos/> (accessed on 13 December 2023).
- Young, S.; Lamont, E.; Bustamante, V. Long Island Native Woody Plants for Landscaping and Restoration of Seaside Environments. **2016**, 26 .
- Koeleruteria paniculata* . Cornell University | Woody Plant Database. Available online: <https://woodyplants.cals.cornell.edu/plant/131> (accessed on 13 December 2023).
- Gilman, E.F.; Watson, D.G. *Malus spp* .: Crabapple. Available online: [https://hort.ifas.ufl.edu/database/documents/pdf/tree\\_fact\\_sheets/malsppa.pdf](https://hort.ifas.ufl.edu/database/documents/pdf/tree_fact_sheets/malsppa.pdf) (accessed on 13 December 2023).
- Gilman, E.F.; Watson, D.G. *Pinus parviflora* : Japanese White Pine. Available online: <https://hort.ifas.ufl.edu/trees/PINPARA.pdf> (accessed on 15 December 2023).
- McKenzie, R. White Pine and Salt Tolerance. Available online: <https://www.extension.purdue.edu/extmedia/fnr/fnr-faq-10-w.pdf> (accessed on 17 December 2023).
- Gilman, E.F.; Watson, D.G. *Pinus strobus* : Eastern White Pine. Available online: <https://edis.ifas.ufl.edu/publication/ST473> (accessed on 17 December 2023).
- Pinus sylvestris* : Scots Pine, European Redwood. Available online: <https://www.ebben.nl/en/treeeb/pisylves-pinus-sylvestris/pdf/> (accessed on 14 December 2023).
- Hallett, R.; Johnson, M.L.; Sonti, N.F. Assessing the Tree Health Impacts of Salt Water Flooding in Coastal Cities: A Case Study in New York City. *Landsc. Urban Plan.* **2018**, 177 , 171–177, doi:10.1016/j.landurbplan.2018.05.004.
- Zencirkiran, M. *Trends in Landscape, Agriculture, Forest and Natural Science* ; Cambridge Scholars Publishing: Lady Stephenson Library, UK, 2019; ISBN 978-1-5275-4357-7.
- Gilman, E.F.; Watson, D.G. *Quercus acutissima* : Sawtooth Oak. Available online: <https://edis.ifas.ufl.edu/publication/ST540> (accessed on 13 December 2023).
- Quercus acutissima* : Sawtooth Oak. Available online: <https://www.ebben.nl/en/treeeb/quacutis-quercus-acutissima/pdf/> (accessed on 13 December 2023).
- Shingle Oak Trees. Available online: <https://www.midwestgardentips.com/trees-index-1/shingle-oak-trees> (accessed on 13 December 2023).
- Quercus phellos* . North Carolina State Extension. Available online: <https://plants.ces.ncsu.edu/plants/quercus-phellos/> (accessed on 13 December 2023).
- Wind Resistance of Trees. Available online: <https://blogs.ifas.ufl.edu/pinellasco/files/2018/03/wind-resistance-of-trees.pdf> (accessed on 13 December 2023).
- Species- *Styphnolobium japonicum* . Cornell University | Woody Plant Database. Available online: <https://woodyplants.cals.cornell.edu/plant/234> (accessed on 13 December 2023).

33. Gilman, E.F.; Watson, D.G.; Klein, R.W.; Koeser, A.K.; Hilbert, D.R.; McLean, D.C. *Taxodium ascendens* : Pondcypress. Available online: <https://edis.ifas.ufl.edu/publication/ST619> (accessed on 13 December 2023).
34. Landscape Plants - *Zelkova serrata* . Oregon State University. Available online: <https://landscapeplants.oregonstate.edu/plants/zelkova-serrata> (accessed on 13 December 2023).
